# Supplementary material
Source: PubMed Central journal article supplement (PMC6452724)
Supplement: pnas.1818485116.sapp.pdf [file pnas.1818485116.sapp.pdf]

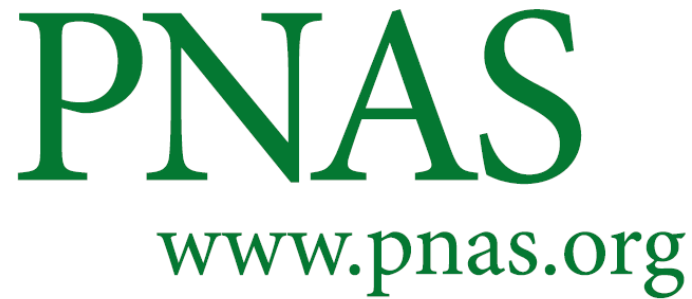

Supplementary Information for

**Transcriptome profiling of *Plasmodium vivax* in *Saimiri* monkeys identifies potential ligands for invasion**

Karthigayan Gunalan, Juliana M. Sá, Roberto R. Moraes Barros, Sarah L. Anzick, Ramoncito L. Caleon, J. Patrick Mershon, Kishore Kanakabandi, Monica Paneru, Kimmo Virtaneva, Craig Martens, John W. Barnwell, Jose M. Ribeiro and Louis H. Miller

Karthigayan Gunalan or Louis H. Miller

Email: [Karthigayan.gunalan@nih.gov](mailto:Karthigayan.gunalan@nih.gov), [LMILLER@niaid.nih.gov](mailto:LMILLER@niaid.nih.gov)

**This PDF file includes:**

Supplementary text

Figs. S1 to S3

Tables S1 to S5

**Other supplementary materials for this manuscript include the following:**

Dataset S1 and Dataset S2

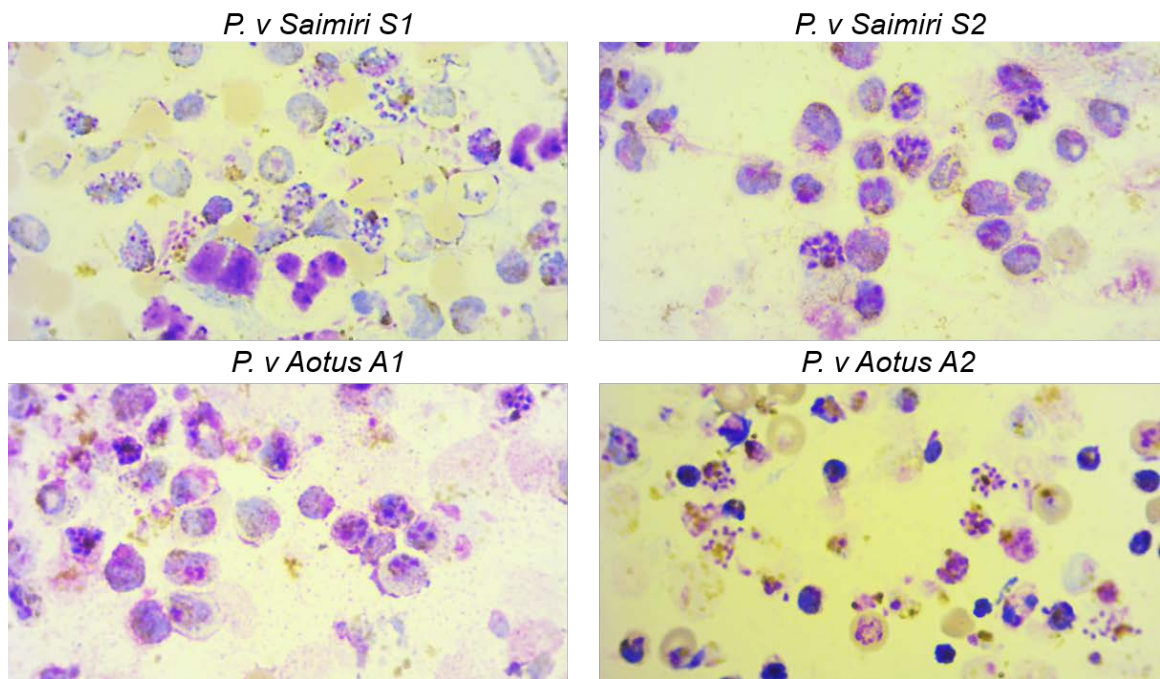

**Fig. S1. *P. vivax* Sal I infection in *Saimiri* and *Aotus* monkeys.** Two *Saimiri* monkeys and two *Aotus* monkeys were infected with the *P. vivax* Sal I parasites. Late schizont stage parasites were purified from monkey blood samples for RNA sequencing analysis. Following enrichment by culture, Giemsa smear was performed on two *Saimiri* and two *Aotus* infections. The panels show the representative smear images from two *Saimiri* and two *Aotus* infections.

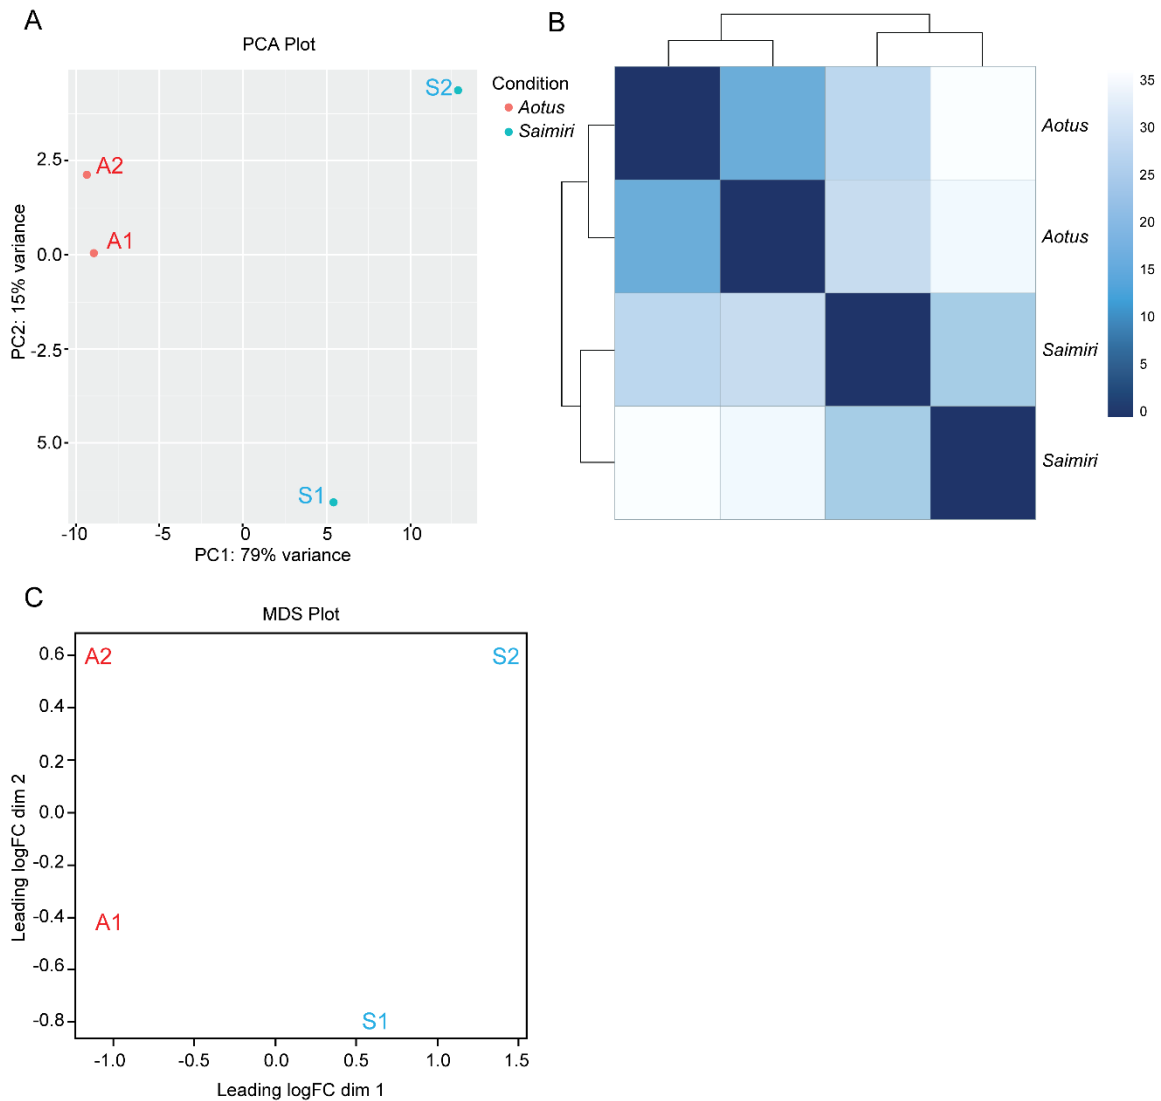

**Fig. S2. Grouping of *P. vivax* infection in *Saimiri* and *Aotus* monkey using RNA seq data.** A. Principal component analysis (PCA) plot shows the grouping of the two *Aotus* (Red) and two *Saimiri* (Blue) *P. vivax* Sal I infections based on the differentially expressed genes between the two groups using DESeq2. B. Heatmap of Euclidean distances between samples show the grouping of the two *Aotus* and two *Saimiri* samples using DESeq2. C. Multiple dimensional scaling (MDS) plot shows the grouping of the two *Aotus* (Red) and two *Saimiri* (Blue) *P. vivax* Sal I infections based on the differentially expressed genes between the two groups using edgeR.

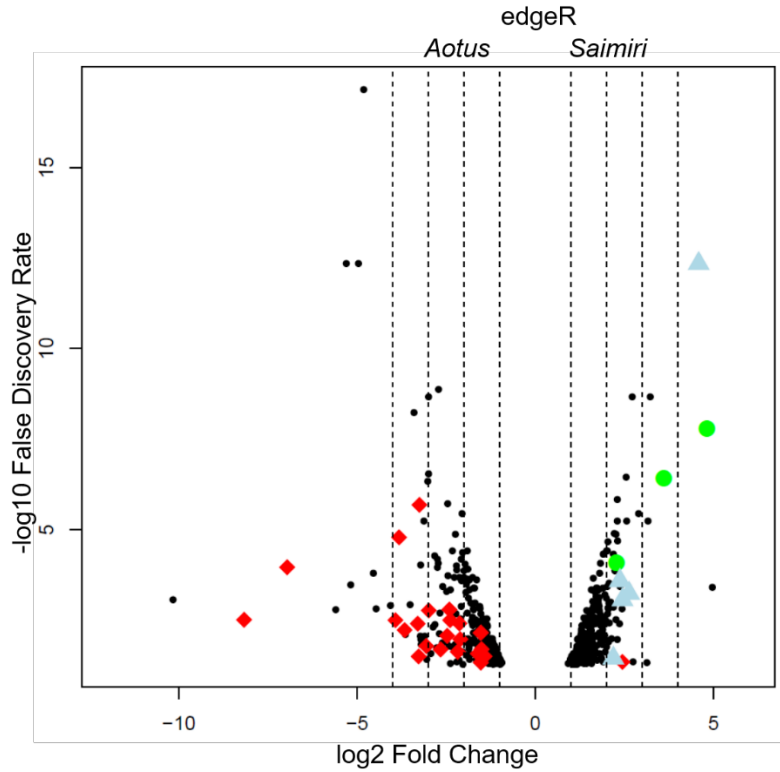

**Fig. S3. Volcano plot showing the differential expression of genes in *Aotus* and *Saimiri* *P. vivax* infection by edgeR analysis.** The volcano plot represents the significantly differential gene expression (False Discovery Rate < 0.05) of *P. vivax* schizonts from *Saimiri* or *Aotus* monkeys. The horizontal axis represents the expected log2 fold change as estimated by the program edgeR. The left four vertical dashed lines represents 16-, eight-, four- and twofold changes in *Aotus*-derived *P. vivax* genes, while the right four vertical lines represent two-, four-, eight- and 16-fold changes in *Saimiri*-derived *P. vivax* genes. The red diamonds represent transcripts coding for Vir proteins, the green circles represent transcripts coding for proteins of the MSP family, and the light blue triangles represent transcripts coding for proteins of the tryptophan-rich family. All genes can be identified in the Dataset S2.

**Table S1. Differential expression of merozoite invasion ligands in *Saimiri* compared to *Aotus* monkey.**

| Entrez Gene                       | Description                                        | DESeq2           |          | edgeR            |        |
|-----------------------------------|----------------------------------------------------|------------------|----------|------------------|--------|
|                                   |                                                    | log2 Fold Change | Padj*    | log2 Fold Change | FDR    |
| <i>Saimiri P. vivax</i> infection |                                                    |                  |          |                  |        |
| PVX_090330                        | reticulocyte binding protein 2 precursor (PvRBP-2) | 1.72             | 8.46E-02 |                  |        |
| PVX_098585                        | reticulocyte-binding protein 1 (RBP1)              | 1.55             | 1.26E-02 | 1.44633          | 0.0221 |
| PVX_125738                        | reticulocyte binding protein 1 precursor           | 0.67             | 5.10E-01 |                  |        |
| PVX_098582                        | reticulocyte-binding protein 1 (RBP1), like        | 0.89             | 4.16E-01 |                  |        |
| PVX_094255                        | reticulocyte binding protein 2 precursor           | 0.36             | 7.90E-01 |                  |        |
| PVX_121920                        | reticulocyte-binding protein 2 (RBP2), like        | 0.11             | 9.23E-01 |                  |        |
| PVX_116930                        | reticulocyte binding protein 2 homolog B           | 0.63             | 2.91E-01 |                  |        |
| <i>Aotus P. vivax</i> infection   |                                                    |                  |          |                  |        |
| PVX_090325                        | reticulocyte binding protein 2 precursor (PvRBP-2) | -0.05            | 9.72E-01 |                  |        |
| PVX_101590                        | reticulocyte-binding protein 2 (RBP2), like        | -0.85            | 5.71E-01 |                  |        |
| <i>Saimiri P. vivax</i> infection |                                                    |                  |          |                  |        |
| PVX_092275                        | apical merozoite antigen 1                         | 1.45             | 1.22E-02 | 1.44159          | 0.0173 |
| PVX_110810                        | Duffy receptor precursor                           | 1.06             | 1.54E-01 |                  |        |

The table shows the list of nine *P. vivax* reticulocyte binding proteins, Duffy binding protein 1 and Apical merozoite antigen 1 proteins that were differentially upregulated (positive) in *Saimiri* infections with the corresponding log2 fold change by DESeq2 and edgeR analyses. Italicized font indicates genes that were up-regulated above a log2 fold change cutoff of 1. \* Genes with adjusted p value (padj) < 0.05. FDR: False-discovery rate.

**Table S2. Differential expression of serine-repeat antigen (SERA) families in *Saimiri* and *Aotus* infection**

| Entrez Gene                       | Description                    | DESeq2           |          | edgeR            |          |
|-----------------------------------|--------------------------------|------------------|----------|------------------|----------|
|                                   |                                | log2 Fold Change | Padj*    | log2 Fold Change | FDR      |
| <i>Saimiri P. vivax</i> infection |                                |                  |          |                  |          |
| PVX_003820                        | serine-repeat antigen 4 (SERA) | <b>2.44</b>      | 5.51E-04 | 2.545943         | 0.000835 |
| PVX_003840                        | serine-repeat antigen 3 (SERA) | <b>2.09</b>      | 5.92E-03 | 0                | 0        |
| PVX_003825                        | serine-repeat antigen 4 (SERA) | <b>2.01</b>      | 1.34E-03 | 2.03052          | 0.002042 |
| PVX_003810                        | serine-repeat antigen 5 (SERA) | <b>2.01</b>      | 7.13E-03 | 1.997015         | 0.017012 |
| PVX_003830                        | serine-repeat antigen 5 (SERA) | <i>1.93</i>      | 9.65E-03 | 1.955192         | 0.022948 |
| PVX_003800                        | serine-repeat antigen (SERA)   | <i>1.67</i>      | 1.02E-02 | 1.493291         | 0.02619  |
| PVX_003795                        | serine-repeat antigen (SERA)   | <i>1.52</i>      | 3.10E-02 | 0                | 0        |
| <i>Aotus P. vivax</i> infection   |                                |                  |          |                  |          |
| PVX_003790                        | serine-repeat antigen (SERA)   | <i>-1.46</i>     | 6.57E-03 | -1.53943         | 0.00766  |

The table shows the number of serine-repeat antigens (SERA) that were upregulated (positive) in *Saimiri* infection or upregulated (negative) in *Aotus* infection with log2 fold change by DESeq2 and edgeR analyses. Bold font indicates genes that were up-regulated above a log2 fold change cutoff of 2; italicized font indicates genes that were up-regulated above a log2 fold change cutoff of 1. \* Genes with adjusted p value (padj) < 0.05. FDR: False-discovery rate.

**Table S3. Differential expression of new *P. vivax* gene families in *Saimiri* and *Aotus* infection.**

| Entrez Gene                       | Description              | DESeq2           |          | edgeR            |          |
|-----------------------------------|--------------------------|------------------|----------|------------------|----------|
|                                   |                          | log2 Fold Change | Padj*    | log2 Fold Change | FDR      |
| <i>Saimiri P. vivax</i> infection |                          |                  |          |                  |          |
| PVX_104690                        | Pv-fam-c protein         | <b>3.72</b>      | 6.13E-03 | 3.128738         | 0.04566  |
| PVX_001695                        | Phist protein (Pf-fam-b) | <b>3.11</b>      | 8.99E-08 | 3.158187         | 5.68E-06 |
| PVX_002565                        | RAD protein (Pv-fam-e)   | <b>2.17</b>      | 9.99E-05 | 2.033917         | 0.001434 |
| PVX_094650                        | RAD protein (Pv-fam-e)   | <b>2.04</b>      | 2.92E-03 | 2.300391         | 0.010668 |
| PVX_089852                        | RAD protein (Pv-fam-e)   | <i>1.87</i>      | 1.98E-02 | 0                | 0        |
| PVX_089455                        | RAD protein (Pv-fam-e)   | <i>1.72</i>      | 3.93E-02 | 0                | 0        |
| PVX_089470                        | RAD protein (Pv-fam-e)   | <i>1.58</i>      | 7.01E-03 |                  |          |
| PVX_001710                        | Phist protein (Pf-fam-b) | <i>1.52</i>      | 4.59E-02 |                  |          |
| <i>Aotus P. vivax</i> infection   |                          |                  |          |                  |          |
| PVX_002515                        | Pv-fam-b protein         | <i>-1.39</i>     | 7.80E-03 | -1.402667        | 0.009692 |
| PVX_089860                        | RAD protein (Pv-fam-e)   | <i>-1.73</i>     | 1.19E-02 | 0                | 0        |
| PVX_002525                        | Pv-fam-b protein         | <i>-1.81</i>     | 3.28E-02 | 0                | 0        |
| PVX_001705                        | Phist protein (Pf-fam-b) | <b>-2.30</b>     | 6.67E-05 |                  |          |
| PVX_002530                        | Pv-fam-b protein         | <b>-2.38</b>     | 5.44E-04 | -2.437857        | 0.001674 |
| PVX_101535                        | Phist protein (Pf-fam-b) | <b>-2.50</b>     | 2.87E-02 | 0                | 0        |
| PVX_112710                        | Pv-fam-d protein         | <b>-2.66</b>     | 1.10E-02 | 0                | 0        |
| PVX_089467                        | RAD protein (Pv-fam-e)   | <b>-2.75</b>     | 4.19E-06 | 0                | 0        |
| PVX_003515                        | Phist protein (Pf-fam-b) | <b>-2.80</b>     | 9.33E-04 | -2.69403         | 0.007233 |
| PVX_101540                        | Pv-fam-d protein         | <b>-3.00</b>     | 1.96E-02 | -3.053298        | 0.037646 |
| PVX_101580                        | Pv-fam-d protein         | <b>-5.00</b>     | 3.37E-05 | -5.186813        | 0.000321 |

The table shows the new *P. vivax* gene families that were upregulated (positive) in *Saimiri* and upregulated (negative) in *Aotus* infection with log2 fold change by DESeq2 and edgeR analyses. Bold font indicates genes that were up-regulated above a log2 fold change cutoff of 2; italicized font indicates genes that were up-regulated above a log2 fold change cutoff of 1. \* Genes with adjusted p value (padj) < 0.05. FDR: False-discovery rate.

**Table S4. Differential expression of ETRAMP in *Saimiri* and *Aotus* infection.**

| Entrez Gene                       | Description                                 | DESeq2           |          | edgeR            |           |
|-----------------------------------|---------------------------------------------|------------------|----------|------------------|-----------|
|                                   |                                             | log2 Fold Change | Padj*    | log2 Fold Change | FDR       |
| <i>Saimiri P. vivax</i> infection |                                             |                  |          |                  |           |
| PVX_003565                        | early transcribed membrane protein (ETRAMP) | <i>1.04</i>      | 4.21E-02 | 1.3107897        | 0.0411052 |
| <i>Aotus P. vivax</i> infection   |                                             |                  |          |                  |           |
| PVX_121950                        | early transcribed membrane protein (ETRAMP) | <i>-1.91</i>     | 4.09E-03 | 0                | 0         |
| PVX_118680                        | early transcribed membrane protein (ETRAMP) | <b>-2.35</b>     | 2.89E-06 | -2.335045        | 3.688E-05 |
| PVX_088870                        | early transcribed membrane protein (ETRAMP) | <b>-5.13</b>     | 1.36E-18 | -1.314227        | 0.0224803 |
| PVX_001715                        | early transcribed membrane protein (ETRAMP) | <b>-5.48</b>     | 2.13E-32 | -5.312396        | 4.498E-13 |

The table shows the number of *P. vivax* early transcribed membrane proteins (ETRAMP) that were upregulated (positive) in *Saimiri* infection or upregulated (negative) in *Aotus* infection with log2 fold change by DESeq2 and edgeR analyses. Bold font indicates genes that were up-regulated above a log2 fold change cutoff of 2; italicized font indicates genes that were up-regulated above a log2 fold change cutoff of 1. \* Genes with adjusted p value (padj) < 0.05. FDR: False-discovery rate.



**Table S5. List of primers for qRT-PCR.**

| Gene                                      | PlasmoDB ID | Oligo Type | 5'-3' sequence                |
|-------------------------------------------|-------------|------------|-------------------------------|
| Apical merozoite antigen 1                | PVX_092275  | For        | ATTGCAACAACGGCGTTATCT         |
|                                           |             | Rev        | GATTCATGTTCCCTCGATTGTTTCTT    |
| Duffy Binding Protein 1                   | PVX_110810  | FAM-BHQ1   | ACCCACAAGAAGTAGACCTGGAGTTCCCC |
|                                           |             | For        | ATGTGGACAATGCTGCTAAATCTC      |
|                                           |             | Rev        | ATGCGTAGAATCTCCTGGAACCT       |
| Phist protein (Pf-fam-b)                  | PVX_001695  | FAM-BHQ1   | CCACCAATTCAAATCCGATAAGTCAGCCT |
|                                           |             | For        | TGCTGGTGGGATTAATGTTCTT        |
|                                           |             | Rev        | AGGACGCCGCTAGTTTTCTCT         |
| Pv-fam-c protein                          | PVX_104690  | FAM-BHQ1   | CGAGCAGCCGCTTAGCACCAAAGA      |
|                                           |             | For        | GATGAAGAAGCATATGAAACAGAAAATTC |
|                                           |             | Rev        | TCAGATCTTCCAGGTTAGGATCATCT    |
| Merozoite Surface Protein 3 gamma (MSP3g) | PVX_097670  | FAM-BHQ1   | TCCAGGAACGCCAAACCATCATG       |
|                                           |             | For        | CCCCAGTGGAAGTGATAATCT         |
|                                           |             | Rev        | CCTGGGGTTCCGCATCT             |
| Merozoite Surface Protein 1               | PVX_099980  | FAM-BHQ1   | CCGTTTCGTTCTGCTGTTCTCCGACTT   |
|                                           |             | For        | TGACGCAGAGGAGTTGGAGTAC        |
|                                           |             | Rev        | CTCTTTCAGGGTTGGAAGTGTCT       |
| Tryptophan-rich antigen (Pv-fam-a)        | PVX_112690  | FAM-BHQ1   | CACGCTAATCATCCCAGAAAGCACCAAT  |
|                                           |             | For        | GAGCATAGCTTCATAAATTTATAATTC   |
|                                           |             | Rev        | TCTGTACTTTGTTATAACGATAGTTT    |
| Hypothetical Protein                      | PVX_094230  | FAM-BHQ1   | ACGAACGCAAAGAAATAAATAATTTGCAC |
|                                           |             | For        | AACCATTGGCGCCTGTTC            |
|                                           |             | Rev        | CAGACACCGCCGGTTCTT            |
| Alanyl tRNA synthetase                    | PVX_115345  | FAM-BHQ1   | CACCCACGGCACCCCTGCACA         |
|                                           |             | For        | TTCCCCGTGAGGCTTCTATTC         |
|                                           |             | Rev        | CCCCTAGGTGGAAGAAAAGCTT        |
| Fumarate Hydratase                        | PVX_099805  | CFO-BHQ1   | CATCAAGCCTAAGGGAAACAACGCC     |
|                                           |             | For        | CTGTCTCCCCTGAGCATGTTCT        |
|                                           |             | Rev        | GCGCACGGAGCTGTAATCT           |
| Glutathione S-transferase                 | PVX_085515  | CFO-BHQ1   | ACGAAGAACAACCTTGCCGTGCCAGATT  |
|                                           |             | For        | CGAGCTGATTCGGCTGATCT          |
|                                           |             | Rev        | TCGCCGAAGCGCTTGT              |
|                                           |             | CFO-BHQ1   | CGCCTACCTGGGCATCCAGTACACG     |
